# Supplementary material for: Growth of TiO2 nanoparticles in thermally evaporated fatty amine thin films by a method of ion entrapmentElectronic supplementary information (ESI) available: Fig. S1: XPS F 2p core level spectra recorded from the ODA–TiF6 composite film before (curve 1) and after hydrolysis (curve 2). See http://www.rsc.org/suppdata/jm/b3/b301314f/
Source: Royal Society of Chemistry journal article supplement (doi:10.1039/b301314f), 2003-03-14
Supplement: b301314f.pdf [file b301314f.pdf]

## Supporting information

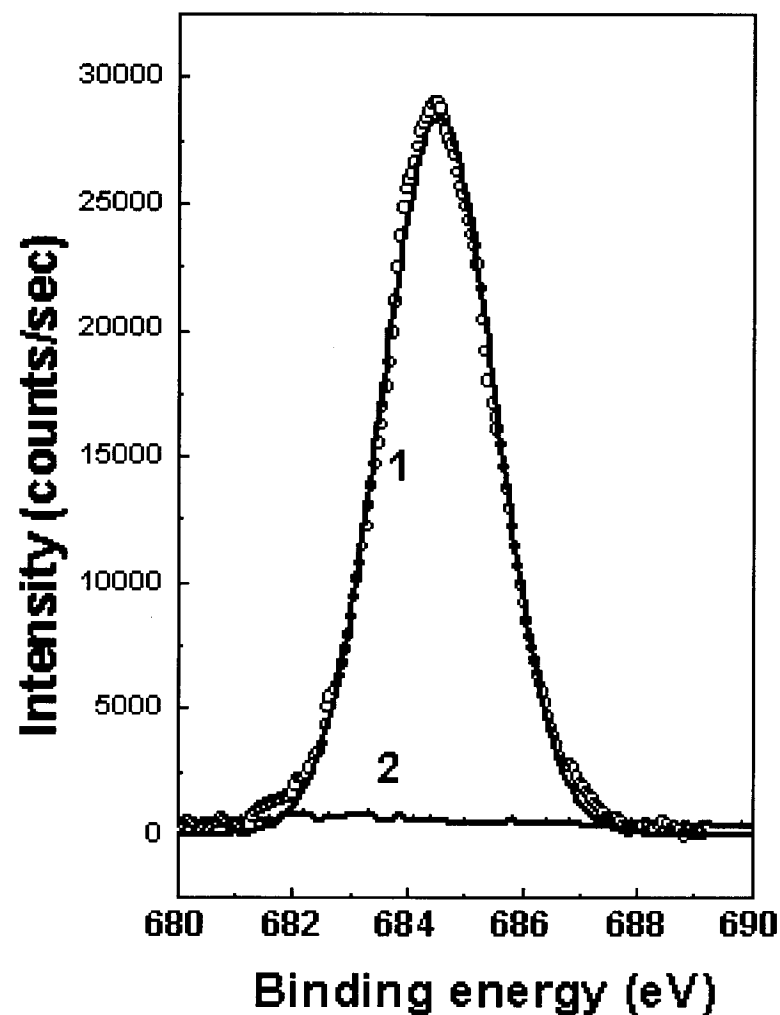

**S1.** XPS F 2p core level spectra recorded from the ODA-TiF<sub>6</sub> composite film before (curve 1) and after hydrolysis (curve 2).
